# Supplementary material
Source: Elsevier journal article supplement (https://www.sciencedirect.com/science/article/pii/S0021755718310799)
Supplement: mmc1 [file S0021755718310799:mmc1.docx]

**MATERIAL SUPLEMENTAR**

**Figura 1: Comparação das distribuições do peso ao nascer em recém-nascidos do sexo masculino e feminino (Coorte BRISA-RP, 2010)**


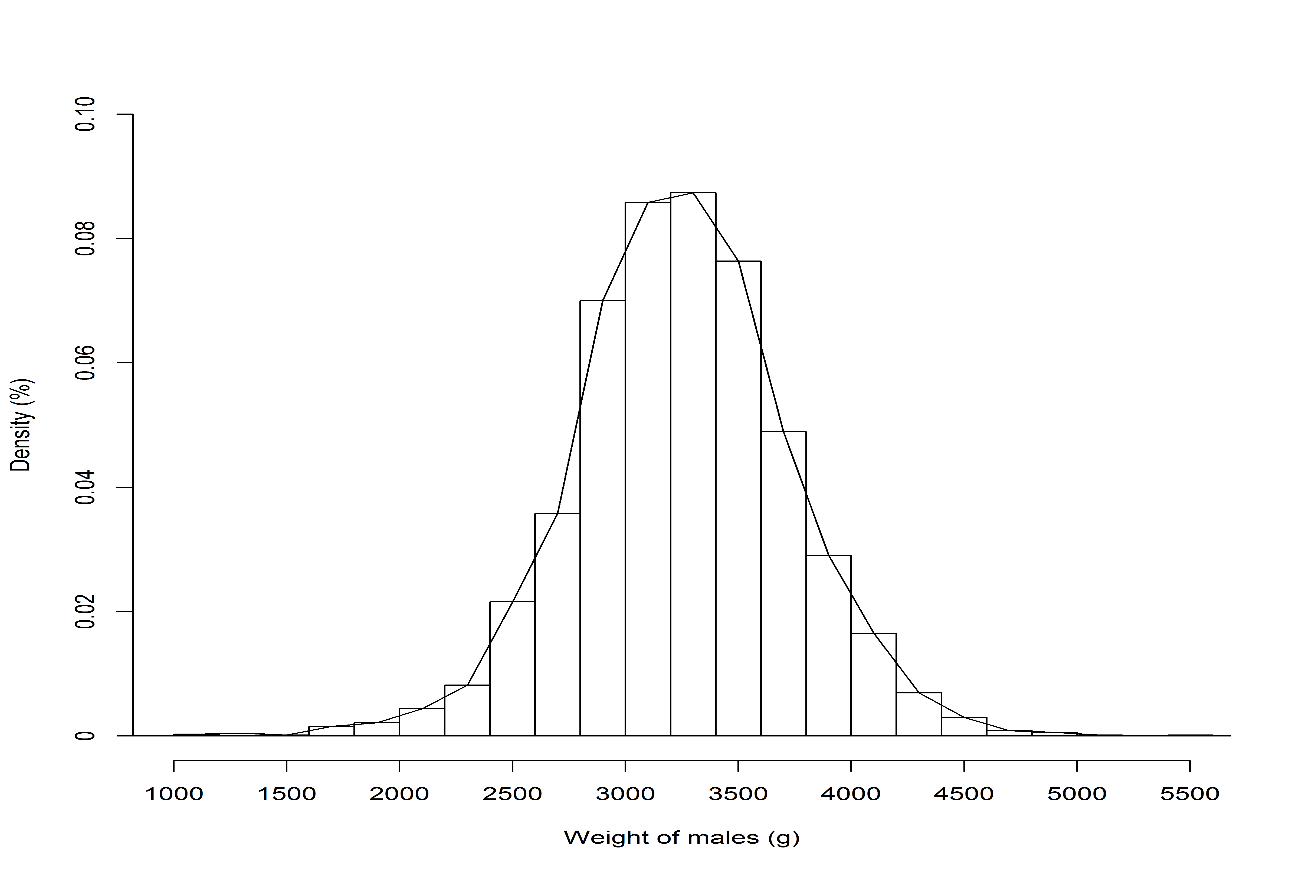


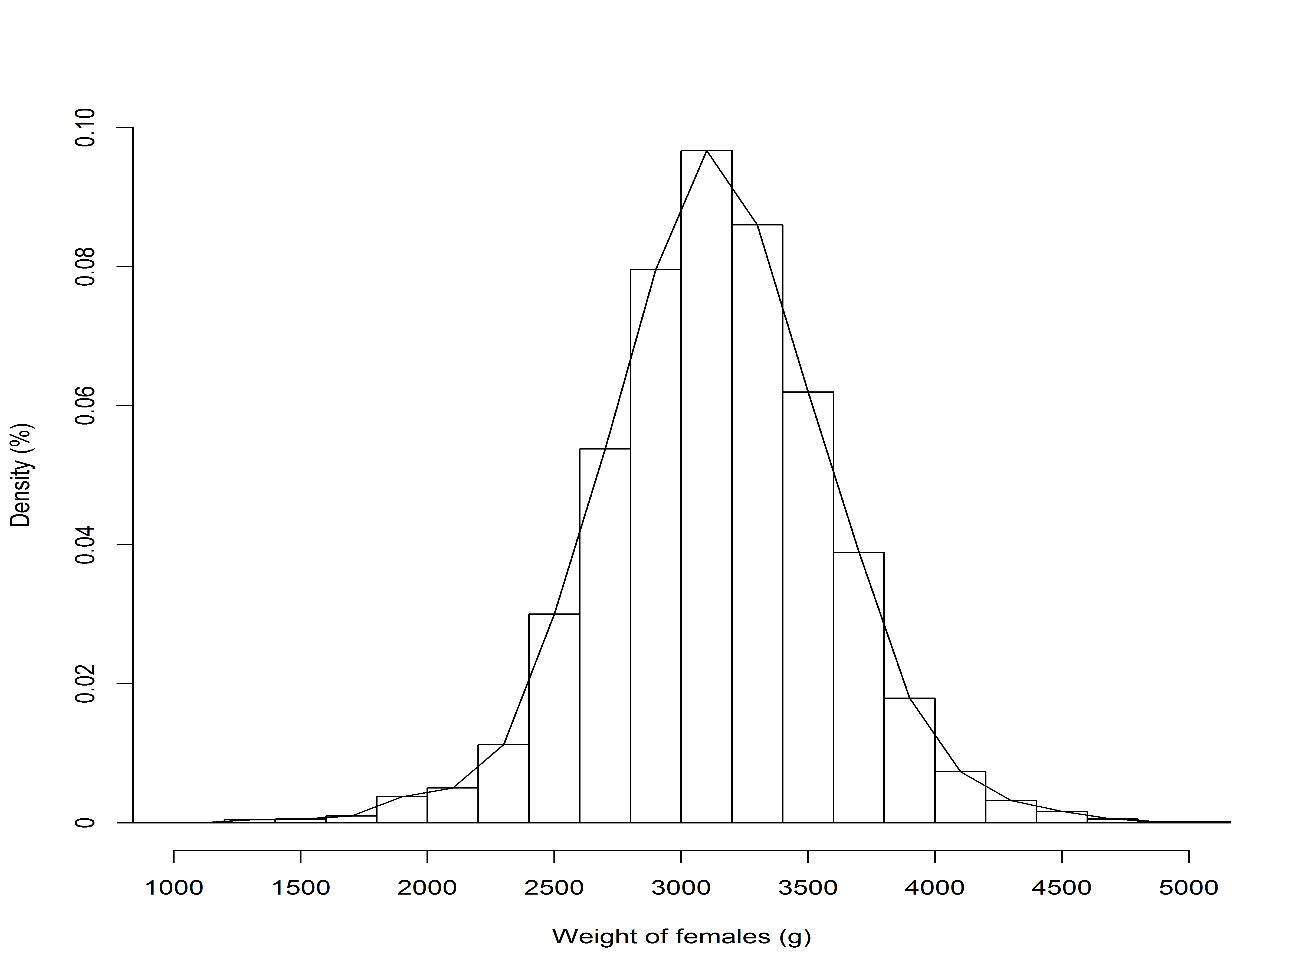


**Tabela 1. Características sócio demográficas maternas**

**(Coorte BRISA-RP, 2010**)

| **Característica Maternas** | **n** | **%** |
| --- | --- | --- |
| **Idade da Mãe (anos)** |  |  |
| 20 – 34 | 5323 | 74,49 |
| <20 | 916 | 12,82 |
| >34 | 907 | 12,69 |
| **Cor de Pele** |  |  |
| Branca | 4178 | 58,96 |
| Não branca | 2908 | 41,04 |
| **Escolaridade (anos de estudo)** |  |  |
| ≥ 12 | 1647 | 23,43 |
| 9 - 11 | 3573 | 50,83 |
| Até 8 | 1809 | 25,74 |
| **Situação Conjugal** |  |  |
| Com companheiro | 6225 | 87,14 |
| Sem companheiro | 918 | 12,86 |
| **Ocupação do Chefe da família** |  |  |
| Não manuais | 1062 | 15,37 |
| Manuais qualificados | 1062 | 15,37 |
| Manuais semi-qualificados | 3053 | 44,19 |
| Manuais não qualificados | 1715 | 24,82 |
| Fora da PEA | 17 | 0,25 |
| **CCEB – ABEP** |  |  |
| A/B | 3385 | 47,83 |
| C | 3038 | 42,83 |
| D/E | 654 | 9,24 |

PEA: fora da população economicamente ativa

CCEB-ABEP: Critério de classificação econômica Brasil segundo a Associação Brasileira de Empresas de Pesquisa.14  A/B: Renda familiar entre R$ 2.565,00 e R$ 12.926,00; C: Renda familiar entre R$ 1024,00 e R$ 1.541,00; D/E: Renda familiar entre R$ 477,00 e R$ 714,00.

**Tabela 2. Características de saúde maternas**

**(Coorte BRISA-RP, 2010**)

| **Características Maternas** | **n** | **%** |
| --- | --- | --- |
| **IMC** |  |  |
| Normal | 3357 | 56,04 |
| Sobrepeso | 1428 | 23,84 |
| Obesidade | 740 | 12,35 |
| Baixo peso | 465 | 7,76 |
| **Fumo durante a gestação** |  |  |
| Nenhum | 6341 | 88,97 |
| <10 | 567 | 7,96 |
| >10 | 194 | 2,72 |
| Fumante não diária | 25 | 0,35 |
| **Paridade** |  |  |
| 1 filho | 3574 | 50,08 |
| 2 ou 3 filhos | 3056 | 42,82 |
| 4 ou mais filos | 507 | 7,10 |
| **Hipertensão** |  |  |
| Sim | 910 | 12,76 |
| Não | 6222 | 87,24 |
| **Diabetes** |  |  |
| Sim | 458 | 6,42 |
| Não | 6673 | 93,58 |
| **Pré-natal** |  |  |
| Adequado | 6729 | 98,23 |
| Inadequado | 121 | 1,77 |
| IMC: índice de massa corporal |  |  |

**Tabela 3:** **Percentis para peso (Kg) de meninos e meninas de acordo com a idade gestacional. Comparação entre IG-21 e Coorte BRISA-RP, 2010**

**.**

| **Peso Meninos (kg)** | | | | | | | | **Peso Meninas (kg)** | | | | | | |
| --- | --- | --- | --- | --- | --- | --- | --- | --- | --- | --- | --- | --- | --- | --- |
|  |  | **p3** | | **p50** | | **p97** | |  | **p3** | | **p50** | | **p97** | |
| **IG** | **n** | **IG-21** | **BRISA** | **IG-21** | **BRISA** | **IG-21** | **BRISA** | **n** | **IG-21** | **BRISA** | **IG-21** | **BRISA** | **IG-21** | **BRISA** |
| 33 | 35 | 1,18 | 1,35 | 1,95 | 2,26 | 2,82 | 3,33 | 35 | 1,2 | 1,34 | 1,86 | 2,22 | 2,61 | 3,23 |
| 34 | 62 | 1,45 | 1,6 | 2,22 | 2,48 | 3,08 | 3,51 | 56 | 1,47 | 1,57 | 2,13 | 2,42 | 2,9 | 3,39 |
| 35 | 99 | 1,7 | 1,84 | 2,47 | 2,68 | 3,32 | 3,67 | 98 | 1,71 | 1,79 | 2,38 | 2,6 | 3,16 | 3,53 |
| 36 | 224 | 1,93 | 2,05 | 2,69 | 2,87 | 3,54 | 3,82 | 186 | 1,92 | 1,98 | 2,6 | 2,77 | 3,39 | 3,67 |
| 37 | 457 | 2,13 | 2,24 | 2,89 | 3,03 | 3,74 | 3,95 | 399 | 2,11 | 2,16 | 2,8 | 2,92 | 3,6 | 3,79 |
| 38 | 888 | 2,32 | 2,4 | 3,07 | 3,17 | 3,92 | 4,06 | 939 | 2,28 | 2,31 | 2,97 | 3,05 | 3,78 | 3,89 |
| 39 | 906 | 2,49 | 2,53 | 3,24 | 3,28 | 4,08 | 4,15 | 885 | 2,42 | 2,43 | 3,13 | 3,15 | 3,94 | 3,98 |
| 40 | 504 | 2,63 | 2,64 | 3,38 | 3,37 | 4,22 | 4,22 | 586 | 2,55 | 2,53 | 3,26 | 3,24 | 4,08 | 4,04 |
| 41 | 255 | 2,76 | 2,71 | 3,51 | 3,42 | 4,35 | 4,25 | 308 | 2,65 | 2,61 | 3,37 | 3,29 | 4,2 | 4,08 |
| 42 | 118 | 2,88 | 2,75 | 3,62 | 3,44 | 4,46 | 4,26 | 106 | 2,74 | 2,65 | 3,46 | 3,32 | 4,3 | 4,09 |
| **Total** | 3548 |  |  |  |  |  |  | 3598 |  |  |  |  |  |  |
| p: percentil, IG: Idade Gestacional (semanas),  IG-21: INTERGROWTH-21 | | | | | | | |  |  |  |  |  |  |  |

**Tabela 4: Percentis para Comprimento de meninos e meninas de acordo com a idade**

**gestacional. Comparação entre IG-21 e Coorte BRISA-RP, 2010**

| **Comprimento Meninos (cm)** | | | | | | | | **Comprimento Meninas (cm)** | | | | | | |
| --- | --- | --- | --- | --- | --- | --- | --- | --- | --- | --- | --- | --- | --- | --- |
|  |  | **p3** | | **p50** | | **p97** | |  | **p3** | | **p50** | | **p97** | |
| **IG** | **n** | **IG-21** | **BRISA** | **IG-21** | **BRISA** | **IG-21** | **BRISA** | **n** | **IG-21** | **BRISA** | **IG-21** | **BRISA** | **IG-21** | **BRISA** |
| 33 | 35 | 39,69 | 39,59 | 43,81 | 44,82 | 47,97 | 49,73 | 35 | 39,79 | 38,95 | 43,39 | 44,73 | 46,85 | 49,55 |
| 34 | 62 | 41,05 | 40,79 | 44,98 | 45,69 | 48,94 | 50,29 | 56 | 41,04 | 40,07 | 44,55 | 45,44 | 47,92 | 49,91 |
| 35 | 99 | 42,26 | 41,89 | 46,03 | 46,51 | 49,82 | 50,85 | 98 | 42,14 | 41,11 | 45,57 | 46,11 | 48,86 | 50,29 |
| 36 | 224 | 43,36 | 42,9 | 46,97 | 47,27 | 50,62 | 51,38 | 186 | 43,13 | 42,05 | 46,48 | 46,75 | 49,69 | 50,68 |
| 37 | 457 | 44,34 | 43,8 | 47,82 | 47,96 | 51,34 | 51,87 | 399 | 44,01 | 42,92 | 47,29 | 47,35 | 50,44 | 51,06 |
| 38 | 888 | 45,22 | 44,6 | 48,59 | 48,58 | 51,99 | 52,31 | 939 | 44,79 | 43,7 | 48,01 | 47,91 | 51,1 | 51,42 |
| 39 | 906 | 46,02 | 45,3 | 49,29 | 49,11 | 52,59 | 52,69 | 885 | 45,49 | 44,4 | 48,65 | 48,41 | 51,69 | 51,75 |
| 40 | 504 | 46,75 | 45,89 | 49,92 | 49,55 | 53,13 | 52,99 | 586 | 46,12 | 45,03 | 49,23 | 48,85 | 52,22 | 52,05 |
| 41 | 255 | 47,41 | 46,36 | 50,52 | 49,89 | 53,62 | 53,21 | 308 | 46,68 | 45,57 | 49,75 | 49,24 | 52,7 | 52,3 |
| 42 | 118 | 48,01 | 46,71 | 51,03 | 50,12 | 54,07 | 53,33 | 106 | 47,19 | 46,03 | 50,22 | 49,55 | 53,12 | 52,5 |
| **Total** | 3548 |  |  |  |  |  |  | 3598 |  |  |  |  |  |  |

p: percentil, IG: Idade Gestacional (semanas), IG-21: INTERGROWTH-21

**Tabela 5: Percentis para Perímetro Cefálico de meninos e meninas de acordo com a idade gestacional. Comparação entre IG-21 e Coorte BRISA-RP, 2010**

| **Perímetro Cefálico Meninos (cm)** | | | | | | | | **Perímetro Cefálico Meninas (cm)** | | | | | | |
| --- | --- | --- | --- | --- | --- | --- | --- | --- | --- | --- | --- | --- | --- | --- |
|  |  | **p3** | | **p50** | | **p97** | |  | **p3** | | **p50** | | **p97** | |
| **IG** | **n** | **IG-21st** | **BRISA** | **IG-21st** | **BRISA** | **IG-21st** | **BRISA** | **n** | **IG-21st** | **BRISA** | **IG-21st** | **BRISA** | **IG-21st** | **BRISA** |
| 33 | 35 | 28,24 | 28,54 | 30,88 | 32,66 | 33,6 | 36,41 | 35 | 27,92 | 28,18 | 30,46 | 32,05 | 33,1 | 35,68 |
| 34 | 62 | 28,93 | 29,24 | 31,47 | 33,14 | 34,1 | 36,68 | 56 | 28,64 | 28,99 | 31,08 | 32,62 | 33,7 | 36,12 |
| 35 | 99 | 29,56 | 29,86 | 32,02 | 33,57 | 34,6 | 36,94 | 98 | 29,28 | 29,65 | 31,64 | 33,12 | 34,1 | 36,46 |
| 36 | 224 | 30,15 | 30,42 | 32,53 | 33,96 | 35 | 37,18 | 186 | 29,87 | 30,2 | 32,14 | 33,52 | 34,6 | 36,72 |
| 37 | 457 | 30,69 | 30,91 | 33,02 | 34,3 | 35,4 | 37,38 | 399 | 30,4 | 30,64 | 32,61 | 33,84 | 34,9 | 36,91 |
| 38 | 888 | 31,21 | 31,33 | 33,47 | 34,59 | 35,8 | 37,55 | 939 | 30,88 | 31 | 33,03 | 34,08 | 35,3 | 37,05 |
| 39 | 906 | 31,69 | 31,68 | 33,9 | 34,82 | 36,2 | 37,68 | 885 | 31,32 | 31,29 | 33,41 | 34,26 | 35,6 | 37,13 |
| 40 | 504 | 32,15 | 31,95 | 34,31 | 34,99 | 36,6 | 37,75 | 586 | 31,72 | 31,51 | 33,76 | 34,4 | 35,9 | 37,18 |
| 41 | 255 | 32,58 | 32,15 | 34,7 | 35,09 | 36,9 | 37,77 | 308 | 32,08 | 31,68 | 34,08 | 34,49 | 36,2 | 37,19 |
| 42 | 118 | 32,99 | 32,26 | 35,07 | 35,12 | 37,2 | 37,72 | 106 | 32,41 | 31,81 | 34,37 | 34,54 | 36,4 | 37,17 |
| **Total** | 3548 |  |  |  |  |  |  | 3598 |  |  |  |  |  |  |

p: percentil, IG: Idade Gestacional (semanas), IG-21: INTERGROWTH-21
